# Supplementary material
Source: PubMed Central journal article supplement (PMC1564282)

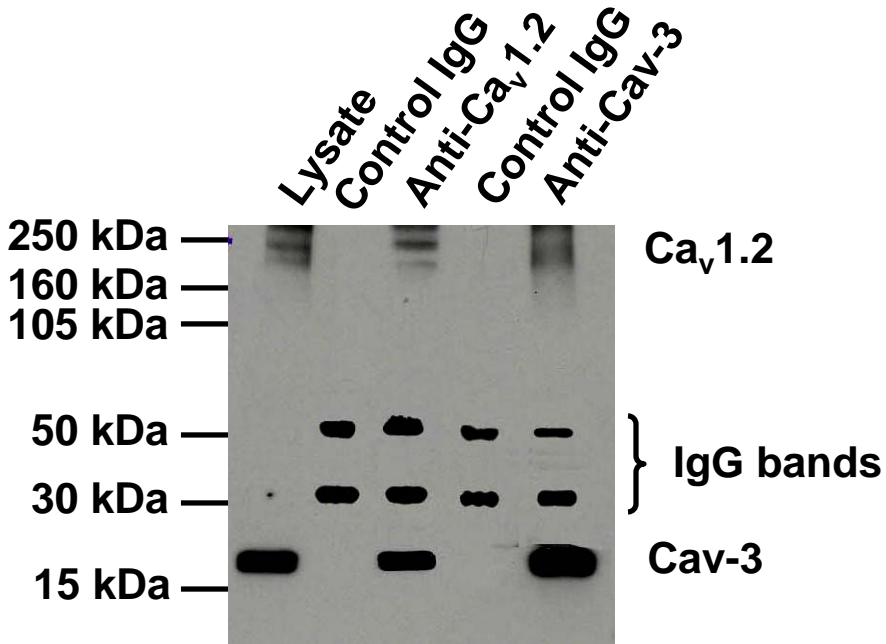

Supplement: pnas_0503465103_1.pdf [file pnas_0503465103_1.pdf]

**A**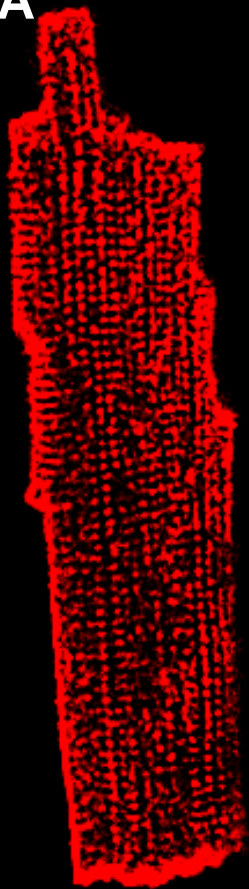**B**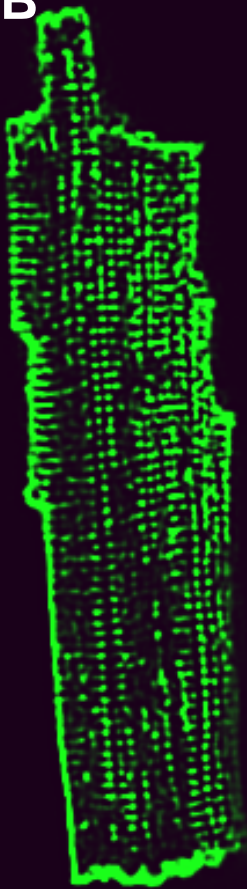**C**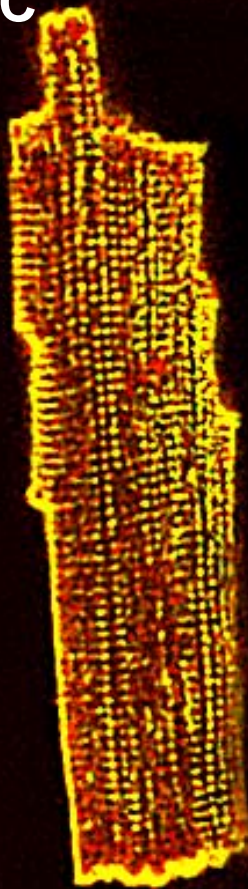

Supplement: pnas_0503465103_2.pdf [file pnas_0503465103_2.pdf]

**A**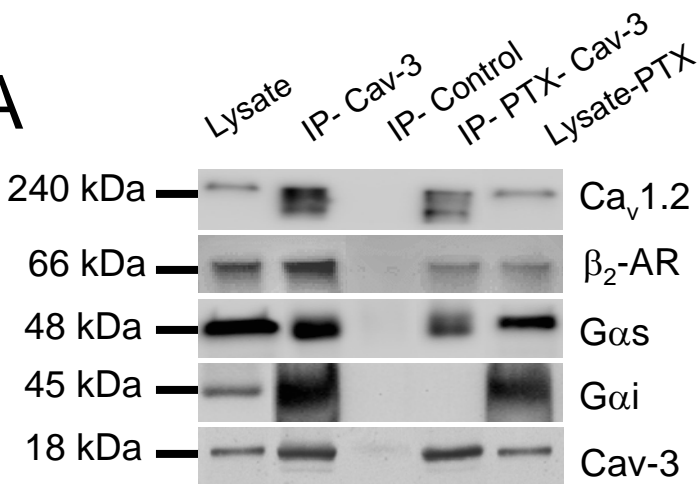**B**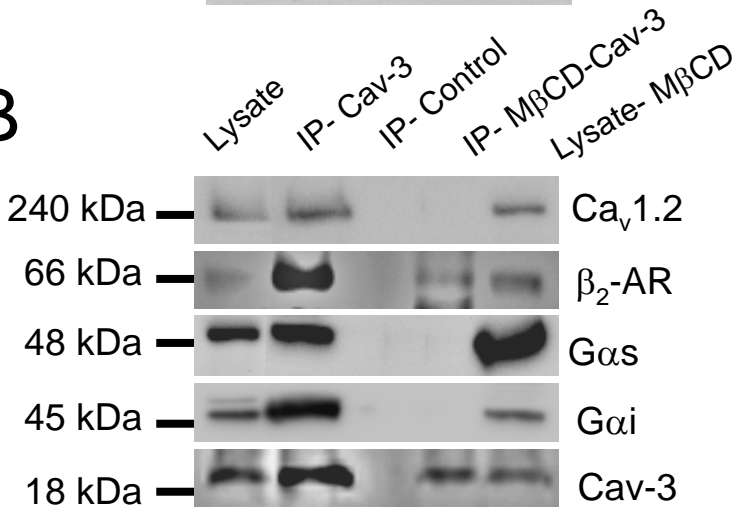**C**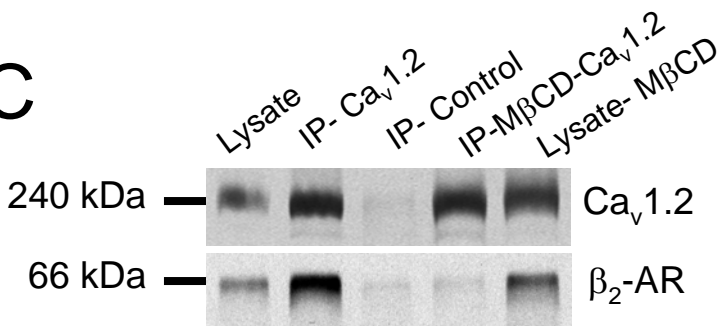

Supplement: pnas_0503465103_3.pdf [file pnas_0503465103_3.pdf]

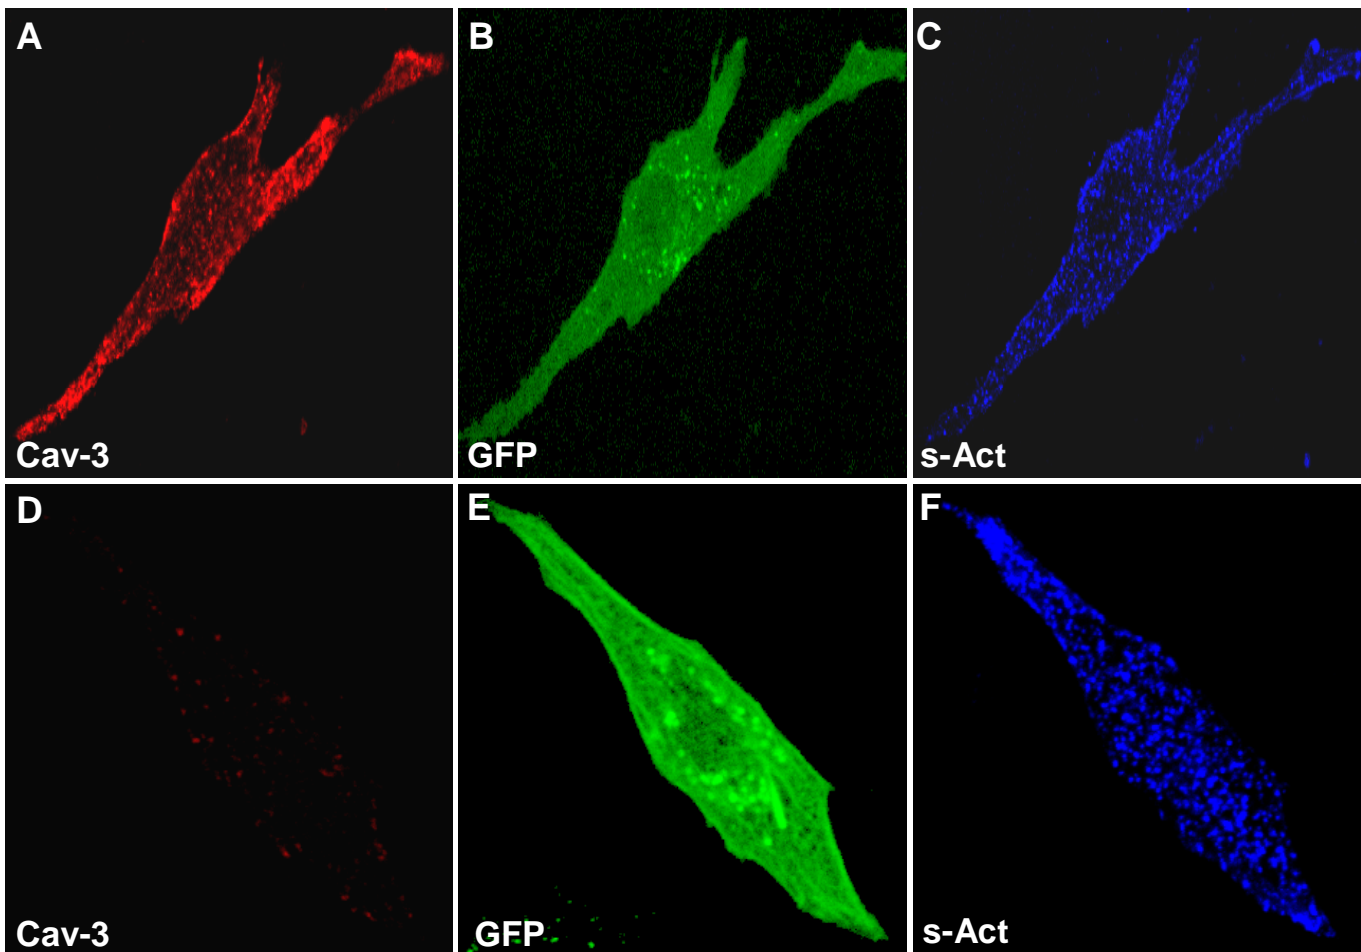

Supplement: pnas_0503465103_4.pdf [file pnas_0503465103_4.pdf]
